# Supplementary material for: The association between obesity and dengue severity among pediatric patients: A systematic review and meta-analysis
Source: PubMed Central journal article supplement (PMC5819989; doi:10.1371/journal.pntd.0006263), 2018-02-07
Supplement: pntd.0006263.s003.pdf [file pntd.0006263.s003.pdf]

**S1 Table: Cut-off Score Points for Study Quality Assessment**

| Group               | Cut off Score |          |      |
|---------------------|---------------|----------|------|
|                     | Good          | Moderate | Poor |
| Selection           | ≥ 3           | 2        | 1    |
| Comparability       | 2             | 1        | 0    |
| Exposure            | ≥ 3           | 2        | 1    |
| <b>Total Points</b> | ≥ 7           | ≥ 5      | ≥ 4  |

Above cut-off score was adapted from McPheeters et al. 2012 report on Quality Improvement Interventions To Address Health Disparities. (Appendix G page 103-104 in <http://www.ncbi.nlm.nih.gov/pubmedhealth/PMH0049229/>)
