# Supplementary material for: The association between obesity and dengue severity among pediatric patients: A systematic review and meta-analysis
Source: PubMed Central journal article supplement (PMC5819989; doi:10.1371/journal.pntd.0006263), 2018-02-07
Supplement: pntd.0006263.s004.pdf [file pntd.0006263.s004.pdf]

| #  | Ovid (Medline)            | No. of Articles | Embase                    | No. of Articles |
|----|---------------------------|-----------------|---------------------------|-----------------|
| 1  | dengue.sh.                | 9,381           | dengue                    | 21,601          |
| 2  | dengue.ti.                | 12,368          | 'dengue'/exp              | 14,943          |
| 3  | dengue.ab.                | 14,527          | adipos*                   | 137,289         |
| 4  | adipos*.sh.               | 85,986          | 'adiposity'/exp           | 379,989         |
| 5  | adipos*.ti.               | 31,842          | obes*                     | 436,404         |
| 6  | adipos*.ab.               | 81,047          | 'obesity'/exp             | 379,989         |
| 7  | obes*.sh.                 | 174,412         | 'body mass index'         | 180,734         |
| 8  | obes*.ti.                 | 103,571         | 'body mass index'/exp     | 256,911         |
| 9  | obes*.ab.                 | 219,105         | bmi                       | 203,359         |
| 10 | body mass index/.sh.      | 107,153         | 'waist circumference*'    | 39,505          |
| 11 | body mass index/.ti.      | 12,313          | 'waist circumference'/exp | 34,879          |
| 12 | body mass index/.ab.      | 144,019         | nutriti*                  | 714,868         |
| 13 | bmi.sh.                   | 0               | 'nutrition'/exp           | 1,801,875       |
| 14 | bmi.ti.                   | 4,131           | malnutriti*               | 64,822          |
| 15 | bmi.ab.                   | 111,517         | 'malnutrition'/exp        | 137,445         |
| 16 | waist circumference*/.sh. | 7,939           | flavi*                    | 63,963          |
| 17 | waist circumference*/.ti. | 1,619           | 'flavivirus'/exp          | 24,224          |
| 18 | waist circumference*/.ab. | 21,571          | #1 OR #2                  | 21,601          |
| 19 | nutriti*.sh.              | 134,472         | #3 - #17/OR               | 2,700,072       |
| 20 | nutriti*.ti.              | 93,489          | #18 AND #19               | 11,564          |
| 21 | nutriti*.ab.              | 191,555         | #20 AND [humans]/lim      | 7,160           |
| 22 | malnutriti*.sh.           | 10,891          |                           |                 |
| 23 | malnutriti*.ti.           | 10,692          |                           |                 |
| 24 | malnutriti*.ab.           | 28,352          |                           |                 |
| 25 | flavi*.sh.                | 11,790          |                           |                 |
| 26 | flavi*.ti.                | 5,896           |                           |                 |
| 27 | flavi*.ab.                | 17,546          |                           |                 |
| 28 | #1 or #2 or #3            | 17,727          |                           |                 |
| 29 | #4 - #27/or               | 807,166         |                           |                 |
| 30 | #28 and #29               | 2,188           |                           |                 |
| 31 | limit 30 to humans        | 1,275           |                           |                 |

| #  | Cochrane                        | No. of Articles | Scopus                                      | No. of Articles |
|----|---------------------------------|-----------------|---------------------------------------------|-----------------|
| 1  | dengue:ti,ab,kw                 | 327             | (TITLE-ABS-KEY(dengue))                     | 23,272          |
| 2  | adipos*:ti,ab,kw                | 4,661           | (TITLE-ABS-KEY(adipos*))                    | 151,350         |
| 3  | obes*:ti,ab,kw                  | 26,156          | (TITLE-ABS-KEY(obes*))                      | 389,750         |
| 4  | 'body mass index':ti,ab,kw      | 24,318          | (TITLE-ABS-KEY('body mass index'))          | 217,123         |
| 5  | bmi:ti,ab,kw                    | 18,064          | (TITLE-ABS-KEY(bmi))                        | 124,707         |
| 6  | 'waist circumference*':ti,ab,kw | 4,541           | (TITLE-ABS-KEY('waist circumference'))      | 34,296          |
| 7  | nutriti*:ti,ab,kw               | 43,825          | (TITLE-ABS-KEY(nutriti*))                   | 584,005         |
| 8  | malnutriti*:ti,ab,kw            | 2,654           | (TITLE-ABS-KEY(malnutriti*))                | 69,516          |
| 9  | flavi*:ti,ab,kw                 | 524             | (TITLE-ABS-KEY(flavi*))                     | 60,790          |
| 10 | #2 - #9/or                      | 83,721          | #2 - #9/OR                                  | 1,237,329       |
| 11 | #1 and #10                      | 48              | #1 AND #10                                  | 3,688           |
| 12 |                                 |                 | #11 AND (LIMIT-TO (EXACTKEYWORD , "Human")) | 2,077           |
| 13 |                                 |                 |                                             |                 |
| 14 |                                 |                 |                                             |                 |
| 15 |                                 |                 |                                             |                 |
| 16 |                                 |                 |                                             |                 |
| 17 |                                 |                 |                                             |                 |
| 18 |                                 |                 |                                             |                 |
| 19 |                                 |                 |                                             |                 |
| 20 |                                 |                 |                                             |                 |
| 21 |                                 |                 |                                             |                 |
| 22 |                                 |                 |                                             |                 |
| 23 |                                 |                 |                                             |                 |
| 24 |                                 |                 |                                             |                 |
| 25 |                                 |                 |                                             |                 |
| 26 |                                 |                 |                                             |                 |
| 27 |                                 |                 |                                             |                 |
| 28 |                                 |                 |                                             |                 |
| 29 |                                 |                 |                                             |                 |
| 30 |                                 |                 |                                             |                 |
| 31 |                                 |                 |                                             |                 |

| #  | Web of Science            | No. of Articles |
|----|---------------------------|-----------------|
| 1  | TS=dengue                 | 19,064          |
| 2  | TI=dengue                 | 11,794          |
| 3  | TS=adipos*                | 118,218         |
| 4  | TI=adipos*                | 36,226          |
| 5  | TS=obes*                  | 305,731         |
| 6  | TI=obes*                  | 120,232         |
| 7  | TS='body mass index'      | 163,965         |
| 8  | TI='body mass index'      | 16,165          |
| 9  | TS=bmi                    | 102,087         |
| 10 | TI=bmi                    | 7,636           |
| 11 | TS='waist circumference'  | 22,803          |
| 12 | TI='waist circumference'  | 2,212           |
| 13 | TS=nutriti*               | 311,477         |
| 14 | TI=nutriti*               | 100,074         |
| 15 | TS=malnutriti*            | 30,961          |
| 16 | TI=malnutriti*            | 8,288           |
| 17 | TS=flavi*                 | 26,775          |
| 18 | TI=flavi*                 | 7,878           |
| 19 | #1 OR #2                  | 19,064          |
| 20 | #3 - #18/OR               | 793,751         |
| 21 | #19 AND #20               | 2,989           |
| 22 | #19 AND #20 NOT TS=animal | 2,766           |
| 23 |                           |                 |
| 24 |                           |                 |
| 25 |                           |                 |
| 26 |                           |                 |
| 27 |                           |                 |
| 28 |                           |                 |
| 29 |                           |                 |
| 30 |                           |                 |
| 31 |                           |                 |
